# Supplementary material for: Snow accumulation rates at Concordia Station, Antarctica, observed by stake farms
Source: Copernicus journal article supplement (doi:10.5194/egusphere-2025-2477), 2025-06-19
Supplement: Supplementary file 1 [file egusphere-2025-2477-supplement.pdf]

## Supplementary Material

### Article title: **Snow accumulation rates at Concordia Station, Antarctica, observed by stake farms**

Claudio Stefanini<sup>1</sup>, Barbara Stenni<sup>1</sup>, Mauro Masiol<sup>1</sup>, Giuliano Dreossi<sup>1</sup>, Vincent Favier<sup>2</sup>, Francesca Becherini<sup>1,3</sup>, Claudio Scarchilli<sup>4†</sup>, Virginia Ciardini<sup>4</sup>, Gabriele Carugati<sup>5</sup>, Massimo Frezzotti<sup>6</sup>

<sup>1</sup>Ca' Foscari University of Venice, Department of Environmental Sciences, Informatics and Statistics, 30172 Venice Mestre, Italy

<sup>2</sup>Université Grenoble Alpes, CNRS, Institut des Géosciences de l'Environnement (IGE), UMR 5001, Grenoble, France

<sup>3</sup>National Research Council-Institute of Polar Sciences, Via Torino 155, 30172 Venice Mestre, Italy

<sup>4</sup>ENEA, Laboratory of Models and Measurements for Air Quality and Climate Observations, Rome, Italy

<sup>5</sup>University of Insubria, 22100 Como, Italy

<sup>6</sup>University Roma Tre, Department of Sciences, Geological Science Section, 00185 Rome, Italy

<sup>†</sup>deceased, 28 March 2025

Correspondence to: Claudio Stefanini (claudio.stefanini@unive.it)

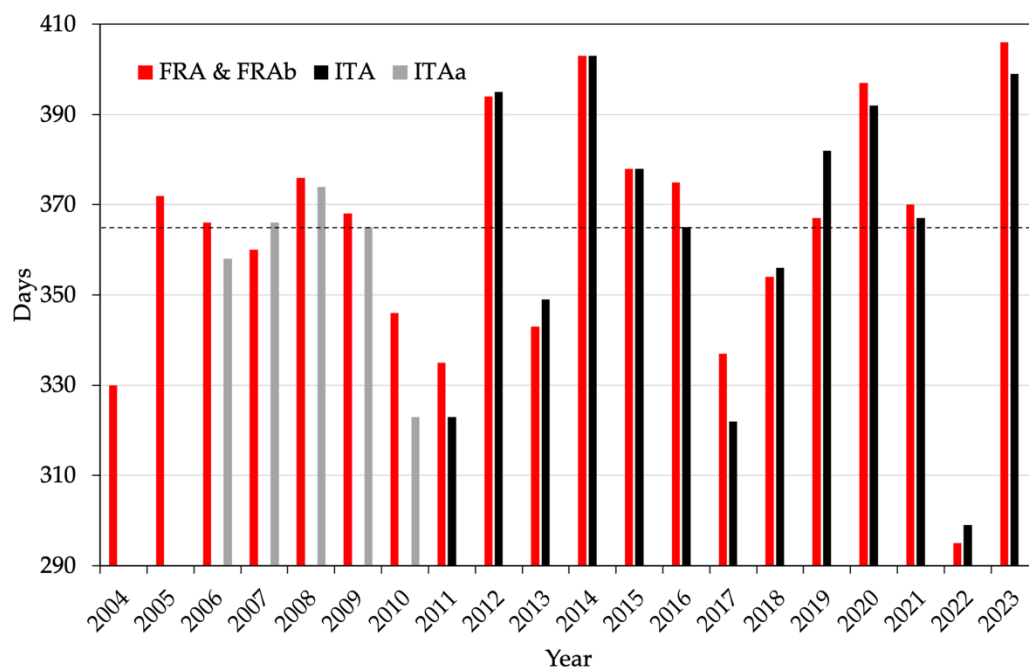

**Figure S1.** Number of days used in the calculation of yearly SMB in Figure 5. Red bars refer both to FRA and FRAb. The dashed black line is the 365-day threshold.

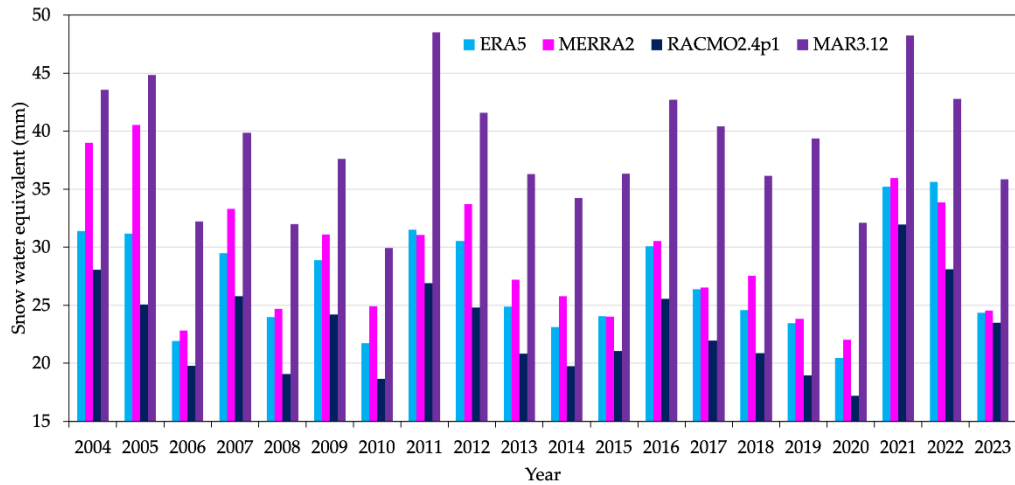

**Figure S2.** Yearly SMB (as s.w.e.) from the reanalysis and RCMs near Concordia Station.

| Year | Mean | St. dev. | Min  | Max  | $\Delta$ ERA5 | $\Delta$ MERRA2 |
|------|------|----------|------|------|---------------|-----------------|
|      | mm   | mm       | mm   | mm   | %             | %               |
| 2004 | 35.5 | 7.1      | 28.1 | 43.6 | +3.8          | +14.5           |
| 2005 | 35.4 | 8.9      | 25.0 | 44.8 | +2.0          | +3.1            |
| 2006 | 24.2 | 5.5      | 19.8 | 32.2 | -4.0          | -6.9            |
| 2007 | 32.1 | 6.0      | 25.8 | 39.8 | +1.1          | +1.5            |
| 2008 | 24.9 | 5.3      | 19.1 | 32.0 | -2.0          | -4.6            |
| 2009 | 30.4 | 5.6      | 24.2 | 37.6 | -0.2          | +0.4            |
| 2010 | 23.8 | 4.8      | 18.7 | 29.9 | +1.2          | +4.8            |
| 2011 | 34.5 | 9.6      | 26.9 | 48.5 | +9.2          | +15.1           |
| 2012 | 32.7 | 7.0      | 24.8 | 41.6 | -7.6          | -6.9            |
| 2013 | 27.3 | 6.6      | 20.8 | 36.3 | +3.2          | +6.5            |
| 2014 | 25.7 | 6.2      | 19.8 | 34.3 | -5.2          | -13.7           |
| 2015 | 26.4 | 6.8      | 21.1 | 36.3 | -2.5          | -3.9            |
| 2016 | 32.2 | 7.3      | 25.6 | 42.7 | +0.4          | -2.2            |
| 2017 | 28.8 | 8.0      | 22.0 | 40.4 | +2.3          | +9.0            |
| 2018 | 27.3 | 6.5      | 20.9 | 36.1 | +3.1          | +5.9            |
| 2019 | 26.4 | 8.9      | 18.9 | 39.4 | -2.1          | -3.8            |
| 2020 | 22.9 | 6.4      | 17.2 | 32.1 | -5.9          | -8.7            |
| 2021 | 37.8 | 7.1      | 32.0 | 48.2 | -1.0          | -1.5            |
| 2022 | 35.1 | 6.1      | 28.1 | 42.8 | +19.0         | +26.6           |
| 2023 | 27.1 | 5.9      | 23.5 | 35.9 | -16.2         | -16.9           |

**Table S1.** Yearly mean, standard deviation, minimum and maximum of the data shown in Figure 6a; the columns  $\Delta$ ERA and  $\Delta$ MERRA2 show the difference, in %, of the estimates of ERA5 and MERRA2, respectively, between the calculation of the yearly sum using the calendar year (as in Figure S2) and the dates of the observations of the FRA stakes.

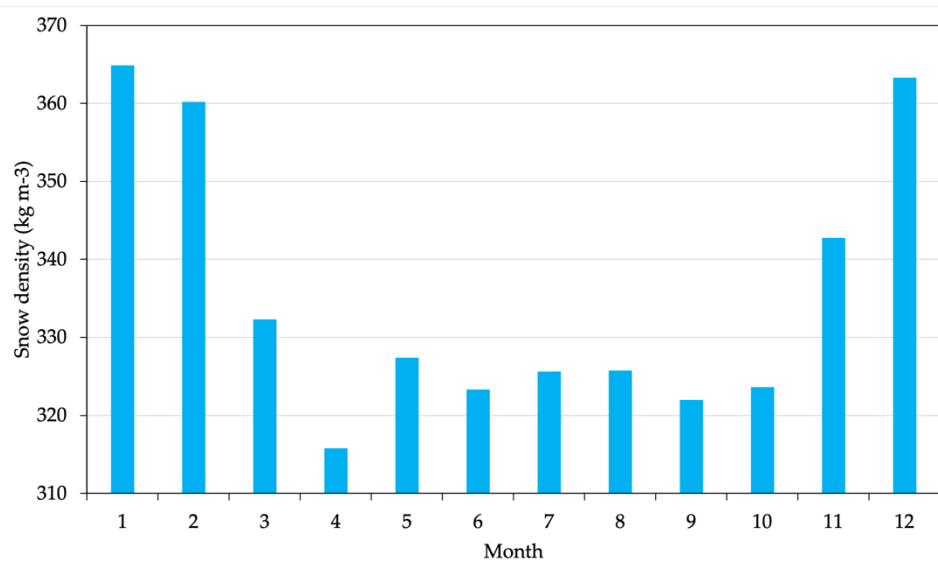

**Figure S3.** Mean monthly snow density in the upper 10 cm of the snowpack near Concordia Station, 2016-2024.
